# Supplementary material for: Human leukocyte antigen (HLA) class II peptide flanking residues tune the immunogenicity of a human tumor-derived epitope
Source: PubMed Central journal article supplement (PMC6937582; doi:10.1074/jbc.ra119.009437), 2019-10-16
Supplement: supp_RA119.009437_152962_1_supp_406004_pzb39x.pdf [file supp_RA119.009437_152962_1_supp_406004_pzb39x.pdf]

Human leukocyte antigen (HLA) class II peptide flanking residues tune the immunogenicity of a human tumor-derived epitope

**Bruce J. MacLachlan<sup>a,†</sup>, Garry Dolton<sup>a</sup>, Athanasios Papakyriakou<sup>b,c</sup>, Alexander Greenshields-Watson<sup>a</sup>, Georgina H. Mason<sup>a</sup>, Andrea Schauenburg<sup>a</sup>, Matthieu Besneux<sup>a</sup>, Barbara Szomolay<sup>a</sup>, Tim Elliott<sup>c,d</sup>, Andrew K. Sewell<sup>a</sup>, Awen Gallimore<sup>a</sup>, Pierre Rizkallah<sup>a</sup>, David K. Cole<sup>a,#,\*</sup>, Andrew Godkin<sup>a,f,\*,&</sup>**

From the <sup>a</sup>Division of Infection & Immunity and Systems Immunity Research Institute, Cardiff University, CF14 4XN, UK; <sup>b</sup>Centre for Biological Sciences, Faculty of Natural & Environmental Sciences, University of Southampton, SO17 1BJ, UK; <sup>c</sup>Institute for Life Sciences, University of Southampton, Southampton, SO17 1BJ, UK; <sup>d</sup>Centre for Cancer Immunology, University of Southampton, Faculty of Medicine, University Hospital Southampton, SO16 6YD, UK  
<sup>f</sup>Department of Gastroenterology and Hepatology, University Hospital of Wales, CF14 4XN, Cardiff, UK.

Running title: *PFRs influence CD4<sup>+</sup> T cell responses to 5T4*

<sup>†</sup> Present address: Monash Biomedicine Discovery Institute, 19 Innovation Walk, Clayton, Victoria, 3800, Australia

<sup>#</sup> Present address: Immunocore Ltd, Milton Park, Abingdon, Oxfordshire, OX14 4RX, UK

\*These authors contributed equally to the study

<sup>&</sup>To whom correspondence should be addressed: Andrew Godkin; Division of Infection & Immunity and Systems Immunity Research Institute, Cardiff University, Henry Wellcome Building, University Hospital of Wales, Heath Park, CF14 4XN, UK; [GodkinAJ@cardiff.ac.uk](mailto:GodkinAJ@cardiff.ac.uk); Tel.+44 (0)29 2068 7003

### **Supporting Information:**

|                                                                                                                                               |      |
|-----------------------------------------------------------------------------------------------------------------------------------------------|------|
| <b>Table S1</b> Intermolecular contacts between Arg-(−3) and HLA-DR1 .....                                                                    | S-2  |
| <b>Table S2.</b> Crystallization conditions from which HLA-DR1-5T4 <sub>111-130</sub> dataset was obtained.....                               | S-3  |
| <b>Figure S1.</b> Specific clone reactivity to cognate 5T4 peptide .....                                                                      | S-4  |
| <b>Figure S2.</b> Flow cytometric analysis of CD4 and TCR expression of the three 5T4-reactive T-cell clones prior to multimer staining ..... | S-5  |
| <b>Figure S3.</b> Core binding register predictions of 5T4 <sub>111-130</sub> and mutated/truncated peptides.....                             | S-6  |
| <b>Figure S4.</b> Additional intermolecular contacts between 5T4 <sub>111-130</sub> PFRs and HLA-DR1 .....                                    | S-7  |
| <b>Figure S5.</b> Crystal packing and symmetry interactions of the HLA-DR1 5T4 <sub>111-130</sub> structure .....                             | S-8  |
| <b>Figure S6.</b> Optimized growth of HLA-DR1-5T4 <sub>111-130</sub> protein crystals through microseeding .....                              | S-9  |
| <b>Video S1.</b> MD trajectories illustrating peptide mobility. ....                                                                          | S-10 |

**Table S1 Intermolecular contacts between Arg(-3) and HLA-DR1**

| Peptide                                      |              | MHC         |           | Contact    |           |      |
|----------------------------------------------|--------------|-------------|-----------|------------|-----------|------|
| Residue                                      | Atom         | Chain       | Residue   | Atom       | Distance  | Type |
| Peptide backbone contacts                    |              |             |           |            |           |      |
| Arg(-3)                                      | C            | DR $\alpha$ | Ser-53    | O $\gamma$ | 3.84      | VW   |
|                                              | O            | DR $\alpha$ | Ser-53    | N          | 3.78      | VW   |
|                                              | O            | DR $\alpha$ | Ser-53    | C $\beta$  | 3.67      | VW   |
|                                              | O            | DR $\alpha$ | Ser-53    | O $\gamma$ | 2.82      | HB   |
| Peptide side chain contacts                  |              |             |           |            |           |      |
| Arg(-3)                                      | C $\beta$    | DR $\alpha$ | Ala-52    | C $\alpha$ | 3.84      | VW   |
|                                              | C $\beta$    | DR $\alpha$ | Phe-51    | C          | 3.83      | VW   |
|                                              | C $\beta$    | DR $\alpha$ | Phe-51    | O          | 3.67      | VW   |
|                                              | C $\beta$    | DR $\alpha$ | Ala-52    | N          | 3.8       | VW   |
|                                              | C $\beta$    | DR $\alpha$ | Ala-52    | C          | 3.73      | VW   |
|                                              | C $\beta$    | DR $\alpha$ | Ser-53    | N          | 3.93      | VW   |
|                                              | C $\gamma$   | DR $\alpha$ | Arg-50    | C          | 3.96      | VW   |
|                                              | C $\gamma$   | DR $\alpha$ | Arg-50    | O          | 3.43      | VW   |
|                                              | C $\delta$   | DR $\alpha$ | Arg-50    | C          | 3.97      | VW   |
|                                              | C $\delta$   | DR $\alpha$ | Arg-50    | O          | 3.71      | VW   |
|                                              | C $\delta$   | DR $\alpha$ | Gly-49    | O          | 3.3       | VW   |
|                                              | N $\epsilon$ | DR $\alpha$ | Gly-49    | O          | 3.85      | VW   |
|                                              | C $\zeta$    | DR $\alpha$ | Gly-49    | O          | 3.67      | VW   |
|                                              | C $\zeta$    | DR $\alpha$ | Ala-52    | O          | 3.93      | VW   |
|                                              | C $\zeta$    | DR $\alpha$ | Ser-53    | C $\beta$  | 3.89      | VW   |
|                                              | NH1          | DR $\alpha$ | Ser-53    | C $\beta$  | 3.58      | VW   |
|                                              | NH2          | DR $\alpha$ | Ala-52    | C          | 3.8       | VW   |
|                                              | NH2          | DR $\alpha$ | Ser-53    | C $\alpha$ | 3.96      | VW   |
|                                              | NH2          | DR $\alpha$ | Gly-49    | C          | 3.81      | VW   |
|                                              | NH2          | DR $\alpha$ | Gly-49    | O          | 2.75      | HB   |
| NH2                                          | DR $\alpha$  | Ala-52      | O         | 2.99       | HB        |      |
| NH2                                          | DR $\alpha$  | Ser-53      | C $\beta$ | 3.91       | VW        |      |
| <b>No. of total contacts</b>                 |              |             |           |            | <b>26</b> |      |
| vdW                                          |              |             |           |            | 23        |      |
| H-bonds                                      |              |             |           |            | 3         |      |
| <b>No. of contacts by Arg(-3) backbone</b>   |              |             |           |            | <b>4</b>  |      |
| vdW                                          |              |             |           |            | 3         |      |
| H-bonds                                      |              |             |           |            | 1         |      |
| <b>No. of contacts by Arg(-3) side chain</b> |              |             |           |            | <b>22</b> |      |
| vdW                                          |              |             |           |            | 20        |      |
| H-bonds                                      |              |             |           |            | 2         |      |

vdW = van der Waals ( $\leq 4.0$  Å cut-off), H-bonds = hydrogen bonds ( $\leq 3.4$  Å cut-off).

**Table S2 Crystallization conditions from which HLA-DR1-5T4<sub>111-130</sub> dataset was obtained**

| HLA-DR1-5T4 <sub>111-130</sub>    |                                                                                 |
|-----------------------------------|---------------------------------------------------------------------------------|
| <b>Crystallisation conditions</b> |                                                                                 |
| <b>Primary screening</b>          |                                                                                 |
| Screen conditions                 |                                                                                 |
| TOPS D1                           | 0.1 M HEPES pH 7.0, 15 % Glycerol, 15 % PEG 4000                                |
| TOPS F12                          | 0.1 M Tris pH 7.5, 0.2 M Ammonium Sulphate, 25 % PEG 8000                       |
| PACT G10                          | 0.02 M Sodium/potassium phosphate, 0.1 M Bis-Tris propane pH 7.5, 20 % PEG 3350 |
| Protein concentration             | 4 mg/mL                                                                         |
| Total drop volume                 | 200 nL                                                                          |
| <b>Seeding</b>                    |                                                                                 |
| Parent seed protein               | Self (HLA-DR1 5T4 <sub>111-130</sub> )                                          |
| Parent seed screen conditions     | TOPS D1, TOPS F12, PACT G10                                                     |
| Dilution volume                   | 1 in 100 (5 mL)                                                                 |
| Dilution buffer                   | PACT G10                                                                        |
| Reservoir buffer                  | PACT G10                                                                        |
| Protein concentration             | 4 mg/mL                                                                         |
| Total drop volume                 | 3 µL                                                                            |

TOPS = TCR-pMHC Optimised Protein Screen (47), PACT = PACT premier™ HT-96 MD1-36 (Molecular Dimensions), % = % w/v.

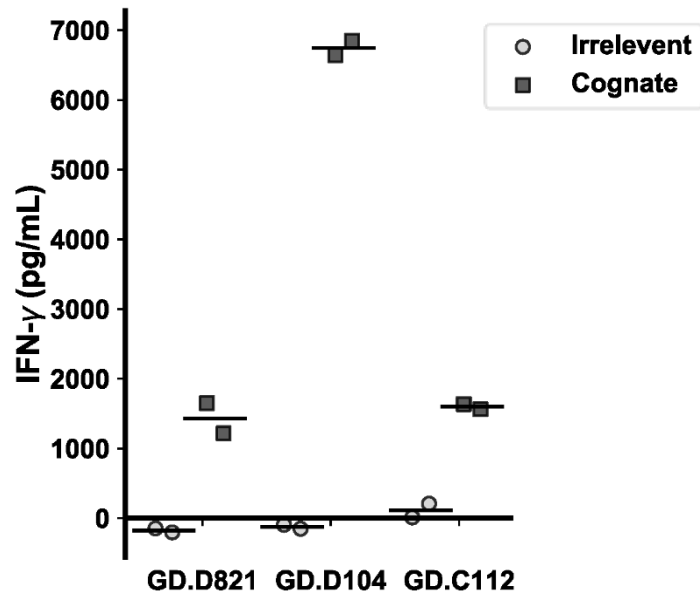

**Figure S1.** Specific clone reactivity to cognate 5T4 peptide. GD.D821, GD.D104 and GD.C112 IFN- $\gamma$  release in response to stimulation with  $10^{-5}$  M irrelevant or cognate peptides as measured by ELISA. Each clone was cross-stimulated with the two non-cognate 5T4 peptides recognized by the three clones as irrelevant peptides controls i.e. the 5T4<sub>11-30</sub> restricted GD.D821 was stimulated with 5T4<sub>111-130</sub> and 5T4<sub>371-390</sub> and *vice versa*. Scatter points = individual response to each irrelevant peptide, horizontal line = mean response to both irrelevant peptides.

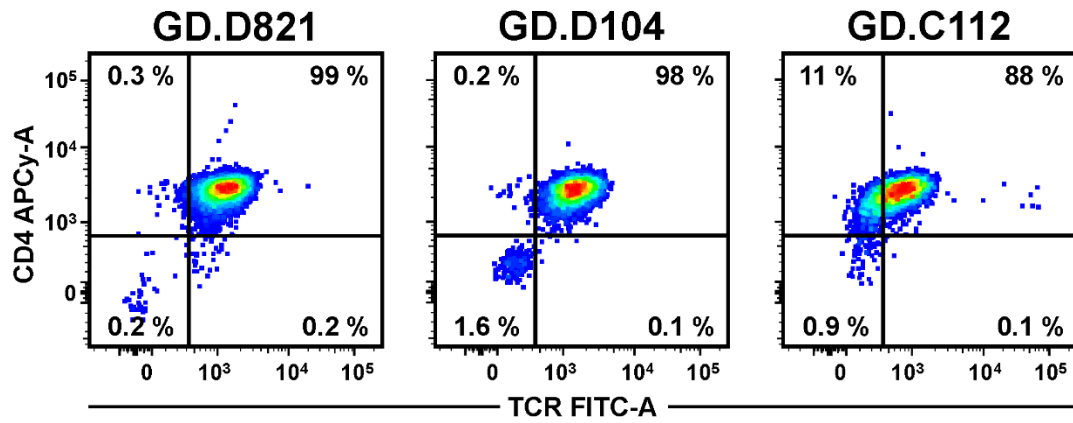

**Figure S2.** Flow cytometric analysis of CD4 and TCR expression of the three 5T4-reactive T-cell clones prior to multimer staining. Each clone exhibited expression of both antigen receptor and co-receptor as indicated by > 88 % of cells CD4<sup>+</sup> TCR<sup>+</sup>. Quadrant gates set according to FMO/unstained negative control populations. Representative of two independent experiments.

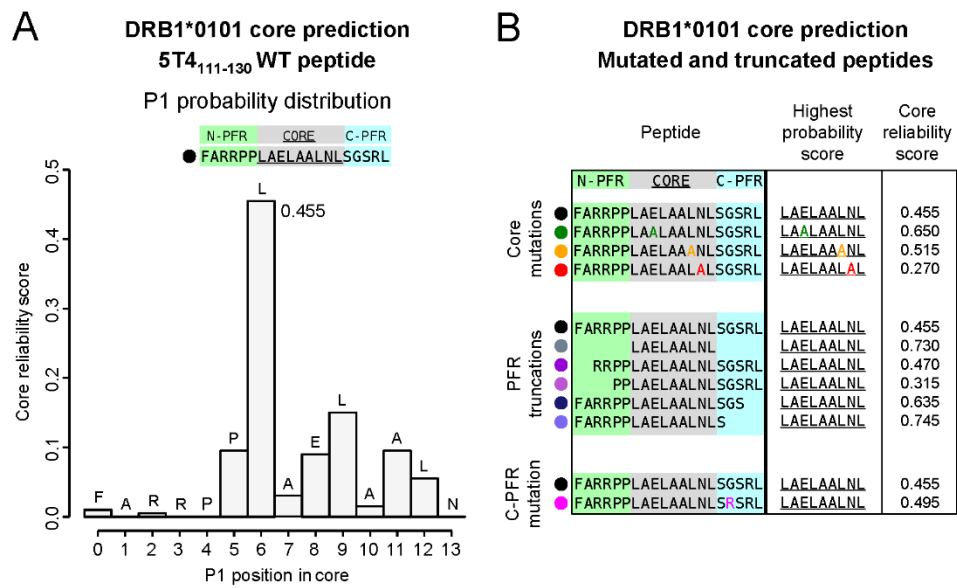

**Figure S3.** Core binding register predictions of 5T4<sub>111-130</sub> and mutated/truncated peptides. (A) Predicted core binding region of wild type 5T4<sub>111-130</sub> performed by NetMHCIIpan v3.2 (FARRPPLAELAALNLSGSRL; core underlined). Probability distribution of predicted residue located at the P1 position of HLA-DRB1\*0101 (DR1), highlighting the most probable core register incorporates Leu (5T4<sub>117</sub>) at position P1 as observed in the crystal structure. (B) Predicted core binding regions of mutated/truncated peptides of 5T4<sub>111-130</sub> used in HLA binding/T-cell clone activation assays. NetMHCIIpan predicts all peptides most likely retain the same core register as wild type 5T4<sub>111-130</sub>.

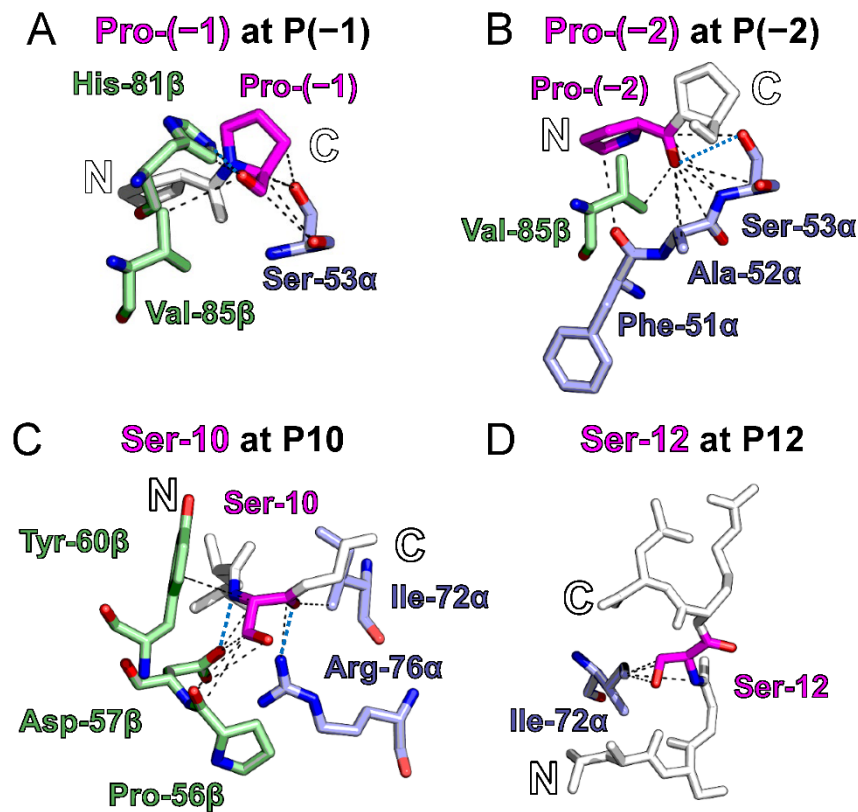

**Figure S4.** Additional intermolecular contacts between 5T4<sub>111-130</sub> PFRs and HLA-DR1. (A) Pro(-1) (magenta) interacting with Ser-53 $\alpha$ , His-81 $\beta$  and Val-85 $\beta$ . Van der Waals contacts ( $\leq 4.0$  Å; black dashed lines), H-bonds ( $\leq 3.4$  Å; blue dashed lines), -DR $\alpha$  contacting residues (blue), -DR1 $\beta$  contacting residues (green). (B) Pro(-2) interacting with Phe-51 $\alpha$ , Ala-52 $\alpha$  & Ser-53 $\alpha$  and Val-85 $\beta$ . Together, Pro(-1) and Pro(-2) form a diproline kink. (C) Ser-10 interacting with DR1 $\alpha$  residues Ile-72 $\alpha$  and Arg-76 $\alpha$  and DR1 $\beta$  residues Pro-56 $\beta$ , Asp-57 $\beta$  and Tyr-60 $\beta$ . (D) Ser-12 interacting with DR1 $\alpha$  residue Ile-72 $\alpha$ . Minimal contacts were observed including no side chain hydrogen bonding between the Ser-12 hydroxyl group and the HLA molecule.

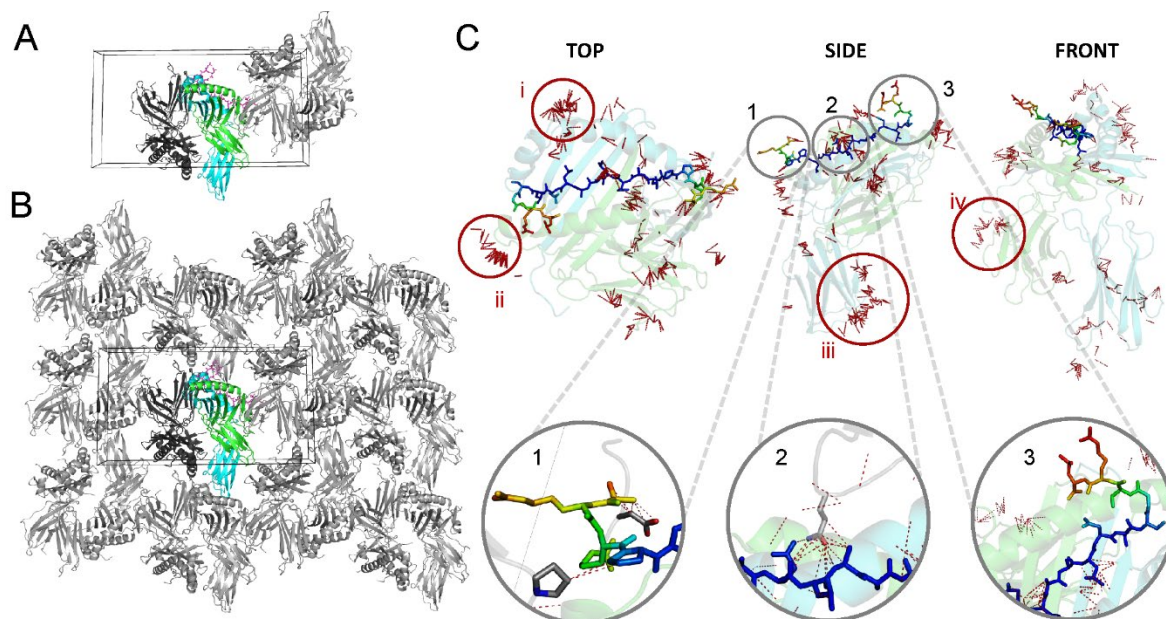

**Figure S5.** Crystal packing and symmetry interactions of the HLA-DR1 5T4<sub>111-130</sub> structure. (A) Cartoon and stick representation of HLA-DR1 5T4<sub>111-130</sub> within the unit cell (black box) of the analyzed crystal structure. The asymmetric unit consisted of two HLA-DR1 5T4<sub>111-130</sub> copies: chain A, B & C (green, cyan & pink respectively) from which crystallographic analyses are calculated, and a second copy D, E & F (dark grey). Symmetry mate within the unit cell is also shown (light grey). (B) Cartoon representation of HLA-DR1 5T4<sub>111-130</sub> within the observed crystal lattice showing symmetry mates within a single two-dimensional lattice (light grey). Asymmetric unit colored as in Fig. S4. A. (C) Cartoon and stick representation of crystal packing interactions. All theoretical crystal contacts (distance  $\leq 4.0$  Å) between the HLA-DR1 5T4<sub>111-130</sub> (chain A, B & C of asymmetric unit) to the second copy of HLA-DR1 5T4<sub>111-130</sub> within the asymmetric unit and contacting symmetry mates. Contacts are shown as red dashed lines. Contact hotspots (red circles) included the  $\beta 1$  helix center (i), the  $\alpha 1$  helix C-terminal edge (ii),  $\beta 2$  domain back (iii) and  $\alpha 2$  domain side (iv). Some contacts by Pro-2 and Arg-4, to flexible loop regions of symmetry mates, was observed within the peptide N-terminus (grey circle 1). In addition, DR1 $\beta$ -Glu-110, within a flexible loop of the DR1  $\beta 2$  domain was stabilized by the rigid central peptide core residues Glu-3, Leu-4 & Ala-5 (grey circle 2). No crystal contacts were made by the C-terminal hairpin loop (grey circle 3). HLA-DR1 represented as cartoon (green & cyan; symmetry mates = grey) with contacting side chains represented as sticks. Peptide is represented as sticks colored by B-factor (blue to red; B-factor range = 21 to 130).



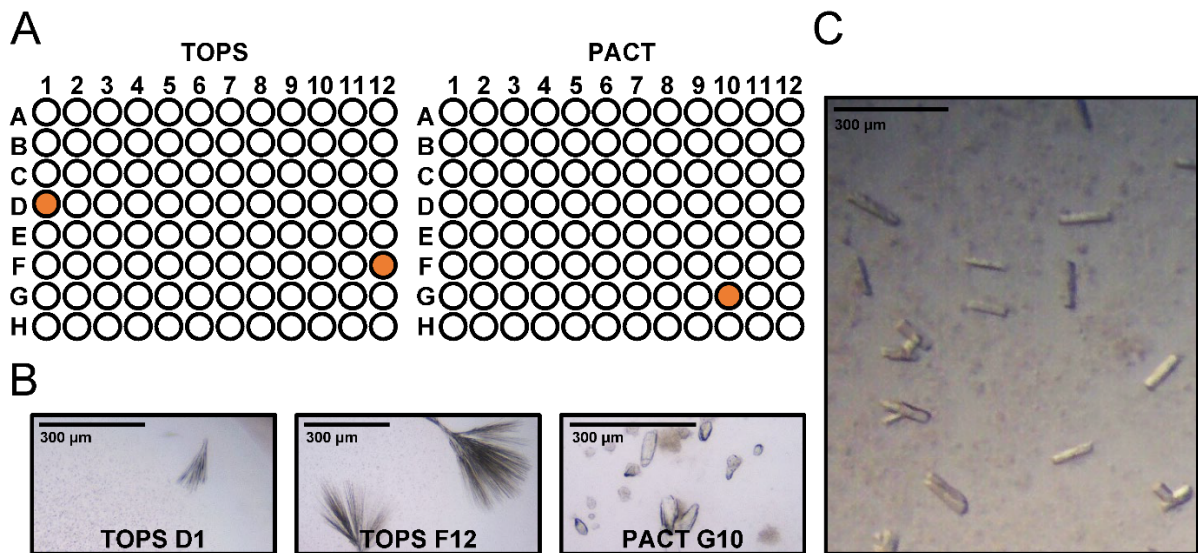

**Figure S6.** Optimized growth of HLA-DR1-5T4<sub>111-130</sub> protein crystals through microseeding. (A) Schematic overview of crystal condition well locations (TOPS D1, TOPS F12 & PACT G10) in which primary screens yielded non-diffractable crystalline material (orange) later used as microseeds for crystal optimization. (B) Stereomicroscope images highlighting non-diffractable crystal forms from primary crystal screening conditions as outlined in Fig. S5. (C) Stereomicroscope images of high-resolution diffracting 3-Dimensional HLA-DR1-5T4<sub>111-130</sub> crystals grown at 4 mg/mL via hanging drop in PACT G10 buffer condition (0.02 M Sodium/potassium phosphate, 0.1 M Bis-Tris propane pH 7.5, 20 % PEG 3350) supplemented with microseed stocks produced from combined crystals described previously. Obtained crystals were approximately 80 μm along the longest edge.

**Video S1.** MD trajectories illustrating peptide mobility. Backbone atoms of PFRs are shown as sticks and color-coded as indicated (inset). Core residues (showing all atoms) are blue sticks with atom coloring as previous. DR $\alpha$  (grey cartoon) and DR1 $\beta$  (purple cartoon) represented from the static crystallographic structure.
